# Supplementary material for: The Effect of the Yingyangbao Complementary Food Supplement on the Nutritional Status of Infants and Children: A Systematic Review and Meta-Analysis
Source: Nutrients. 2019 Oct 8;11(10):2404. doi: 10.3390/nu11102404 (PMC6835467; doi:10.3390/nu11102404)
Supplement: Supplementary file 1 [file nutrients-11-02404-s001.pdf]

## Supplementary Materials

### Table of Contents

|                                                                                                                                                                                                    |    |
|----------------------------------------------------------------------------------------------------------------------------------------------------------------------------------------------------|----|
| <b>Table S1:</b> Risk of bias of post-only with concurrent control studies assessed with Methodological Index for Non-randomized Studies (MINORS).....                                             | 3  |
| <b>Table S2:</b> Risk of bias of pre-post studies assessed with Methodological Index for Non-randomized Studies (MINORS).....                                                                      | 4  |
| <b>Table S3:</b> Composition of three types of YYB.....                                                                                                                                            | 5  |
| <b>Table S4:</b> Effects of YYB by intervention duration on hemoglobin concentration (g/L), height (cm), weight (kg) and Z-scores. ....                                                            | 6  |
| <b>Table S5:</b> Effects of YYB by intervention duration on prevalence of anemia, stunting, underweight and wasting.....                                                                           | 8  |
| <b>Table S6:</b> Effects of YYB on hemoglobin concentration (g/L), height (cm), weight (kg) and Z-scores among studies of high and medium quality <sup>1</sup> .....                               | 10 |
| <b>Table S7:</b> Effects of YYB on prevalence of anemia, stunting, underweight and wasting among studies of high and medium quality <sup>1</sup> .....                                             | 11 |
| <b>Figure S1:</b> Effects of YYB on hemoglobin level (g/L) among post-only with concurrent control studies (a) and pre-post studies (b) using mean difference as the effect measure. ....          | 12 |
| <b>Figure S2:</b> Effects of YYB on height (cm) among post-only with concurrent control studies (a) and pre-post studies (b) using mean difference as the effect measure. ....                     | 13 |
| <b>Figure S3:</b> Effects of YYB on weight (kg) among post-only with concurrent control studies (a) and pre-post studies (b) using mean difference as the effect measure. ....                     | 14 |
| <b>Figure S4:</b> Effects of YYB on height-for-age z score (HAZ) among post-only with concurrent control studies (a) and pre-post studies (b) using mean difference as the effect measure. ....    | 15 |
| <b>Figure S5:</b> Effects of YYB on weight-for-height z score (WHZ) among post-only with concurrent control studies (a) and pre-post studies (b) using mean difference as the effect measure. .... | 16 |
| <b>Figure S6:</b> Effects of YYB on weight-for-age z score (WAZ) among post-only with concurrent control studies (a) and pre-post studies (b) using mean difference as the effect measure. ....    | 17 |
| <b>Figure S7:</b> Effects of YYB on anemia prevalence among post-only with concurrent control studies (a) and pre-post studies (b) using risk ratio as the effect measure. ....                    | 18 |
| <b>Figure S8:</b> Effects of YYB on stunting prevalence among post-only with concurrent control studies (a) and pre-post studies (b) using risk ratio as the effect measure. ....                  | 19 |
| <b>Figure S9:</b> Effects of YYB on underweight prevalence among post-only with concurrent control studies (a) and pre-post studies (b) using risk ratio as the effect measure. ....               | 20 |
| <b>Figure S10:</b> Effects of YYB on wasting prevalence among post-only with concurrent control studies (a) and pre-post studies (b) using risk ratio as the effect measure. ....                  | 21 |
| <b>Figure S11:</b> Effects of YYB on anemia prevalence among post-only with concurrent control                                                                                                     |    |

|                                                                                                                                                                                            |    |
|--------------------------------------------------------------------------------------------------------------------------------------------------------------------------------------------|----|
| studies (a) and pre-post studies (b) using risk difference as the effect measure. ....                                                                                                     | 22 |
| <b>Figure S12:</b> Effects of YYB on stunting prevalence among post-only with concurrent control studies (a) and pre-post studies (b) using risk difference as the effect measure. ....    | 23 |
| <b>Figure S13:</b> Effects of YYB on underweight prevalence among post-only with concurrent control studies (a) and pre-post studies (b) using risk difference as the effect measure. .... | 24 |
| <b>Figure S14:</b> Effects of YYB on wasting prevalence among post-only with concurrent control studies (a) and pre-post studies (b) using risk difference as the effect measure. ....     | 25 |
| <b>Figure S15:</b> Funnel plot of effects of YYB on anemia prevalence among post-only with concurrent control studies. ....                                                                | 26 |
| <b>Figure S16:</b> Funnel plot of effects of YYB on anemia prevalence among pre-post studies. ....                                                                                         | 27 |

**Table S1:** Risk of bias of post-only with concurrent control studies assessed with Methodological Index for Non-randomized Studies (MINORS).

| First Author     | Year | Clearly<br>stated<br>aim | Consecutive<br>inclusion | Prospective<br>collection of<br>data | Appropriate<br>endpoints | Unbiased<br>assessment<br>of study<br>endpoint | Appropriate<br>follow-up<br>period | Loss to<br>follow<br>up <5% | Calculation<br>of study size | Control<br>group<br>with gold<br>standard | Contemporary<br>groups | Baseline<br>equivalence<br>of groups | Adapted<br>statistical<br>analyses | SUM | Overall<br>quality <sup>a</sup> |
|------------------|------|--------------------------|--------------------------|--------------------------------------|--------------------------|------------------------------------------------|------------------------------------|-----------------------------|------------------------------|-------------------------------------------|------------------------|--------------------------------------|------------------------------------|-----|---------------------------------|
| Shuai Li         | 2017 | 7                        | 6                        | 7                                    | 7                        | 3                                              | 5                                  | 6                           | 2                            | 4                                         | 7                      | 7                                    | 5                                  | 66  | High                            |
| Qin Hu           | 2016 | 7                        | 3                        | 7                                    | 5                        | 3                                              | 5                                  | 4                           | 2                            | 3                                         | 7                      | 7                                    | 4                                  | 57  | High                            |
| Xiaoting Ding    | 2016 | 7                        | 3                        | 6                                    | 6                        | 3                                              | 4                                  | 5                           | 2                            | 4                                         | 7                      | 4                                    | 7                                  | 58  | High                            |
| Yanfeng<br>Zhang | 2016 | 7                        | 5                        | 6                                    | 6                        | 4                                              | 6                                  | 3                           | 3                            | 4                                         | 7                      | 4                                    | 4                                  | 59  | High                            |
| Lingyun Ren      | 2014 | 7                        | 2                        | 6                                    | 5                        | 2                                              | 5                                  | 5                           | 2                            | 2                                         | 7                      | 3                                    | 4                                  | 50  | Medium                          |
| Shangming Li     | 2014 | 7                        | 2                        | 6                                    | 4                        | 2                                              | 4                                  | 4                           | 2                            | 4                                         | 7                      | 3                                    | 3                                  | 48  | Low                             |
| Songli Fan       | 2013 | 7                        | 4                        | 7                                    | 5                        | 3                                              | 2                                  | 3                           | 2                            | 3                                         | 7                      | 3                                    | 3                                  | 49  | Low                             |
| Wenhao Li        | 2013 | 7                        | 6                        | 7                                    | 7                        | 3                                              | 2                                  | 6                           | 2                            | 4                                         | 7                      | 7                                    | 6                                  | 64  | High                            |
| Wenli Zhao       | 2012 | 6                        | 3                        | 6                                    | 5                        | 3                                              | 4                                  | 3                           | 3                            | 4                                         | 7                      | 4                                    | 5                                  | 53  | Medium                          |
| Zhifeng Fang     | 2010 | 6                        | 2                        | 6                                    | 5                        | 3                                              | 3                                  | 3                           | 2                            | 3                                         | 7                      | 4                                    | 4                                  | 48  | Low                             |
| Yuying Wang      | 2009 | 7                        | 3                        | 7                                    | 5                        | 3                                              | 4                                  | 3                           | 2                            | 2                                         | 7                      | 4                                    | 5                                  | 52  | Medium                          |
| Yuying Wang      | 2004 | 7                        | 3                        | 7                                    | 5                        | 2                                              | 4                                  | 4                           | 2                            | 2                                         | 7                      | 4                                    | 4                                  | 51  | Medium                          |
| Shuhua Ni        | 1995 | 7                        | 2                        | 7                                    | 5                        | 2                                              | 3                                  | 3                           | 1                            | 4                                         | 7                      | 3                                    | 4                                  | 48  | Low                             |

The overall quality is based on total MINORS score. In post-only studies, we defined a paper with a score higher than 53 a high-quality one, 50-53 a moderate-quality one, and lower than 50 a low-quality one.

**Table S2:** Risk of bias of pre-post studies assessed with Methodological Index for Non-randomized Studies (MINORS).

| First Author     | Year | Clearly<br>stated aim | Consecutive<br>inclusion | Prospective<br>collection of<br>data | Appropriate<br>endpoints | Unbiased<br>assessment of<br>study endpoint | Appropriate<br>follow-up<br>period | Loss to follow<br>up <5% | Prospective<br>calculation of<br>study size | SUM | Overall<br>quality <sup>a</sup> |
|------------------|------|-----------------------|--------------------------|--------------------------------------|--------------------------|---------------------------------------------|------------------------------------|--------------------------|---------------------------------------------|-----|---------------------------------|
| Jie Wang         | 2017 | 7                     | 4                        | 7                                    | 5                        | 3                                           | 5                                  | 3                        | 4                                           | 38  | High                            |
| Ping Wu          | 2017 | 5                     | 3                        | 5                                    | 4                        | 2                                           | 4                                  | 4                        | 1                                           | 28  | Low                             |
| Qiujiang Jiang   | 2016 | 7                     | 5                        | 6                                    | 4                        | 3                                           | 4                                  | 4                        | 2                                           | 35  | Medium                          |
| Junsheng Huo     | 2015 | 7                     | 5                        | 7                                    | 6                        | 4                                           | 6                                  | 5                        | 4                                           | 44  | High                            |
| Qiannan<br>Zhang | 2015 | 7                     | 4                        | 7                                    | 6                        | 3                                           | 4                                  | 5                        | 7                                           | 43  | High                            |
| Jianhong Qin     | 2014 | 6                     | 3                        | 7                                    | 3                        | 2                                           | 4                                  | 4                        | 2                                           | 31  | Medium                          |
| Zuyang Liu       | 2013 | 6                     | 3                        | 6                                    | 5                        | 2                                           | 5                                  | 4                        | 2                                           | 33  | Medium                          |
| Zengkang Xu      | 2012 | 7                     | 5                        | 7                                    | 5                        | 4                                           | 6                                  | 4                        | 3                                           | 41  | High                            |
| Caixia Dong      | 2012 | 7                     | 4                        | 7                                    | 6                        | 3                                           | 3                                  | 4                        | 4                                           | 38  | High                            |
| Lixiang Li       | 2012 | 5                     | 3                        | 6                                    | 4                        | 3                                           | 2                                  | 3                        | 2                                           | 28  | Low                             |
| Lijuan Wang      | 2011 | 7                     | 3                        | 7                                    | 6                        | 3                                           | 2                                  | 4                        | 2                                           | 34  | Medium                          |
| Jing Sun         | 2011 | 5                     | 3                        | 6                                    | 5                        | 4                                           | 2                                  | 3                        | 2                                           | 30  | Low                             |
| Hong Shen        | 2011 | 4                     | 2                        | 5                                    | 3                        | 2                                           | 2                                  | 2                        | 1                                           | 21  | Low                             |

The overall quality is based on total MINORS score. In pre-post studies, papers with scores higher than 35 were of high quality, 31-35 were of moderate quality, and less than 31 were of low quality.

**Table S3:** Composition of three types of YYB.

|                                     | A                    | B                    | C                        |
|-------------------------------------|----------------------|----------------------|--------------------------|
|                                     | (one sachet per day) | (one sachet per day) | (one sachet per 10 days) |
| Protein                             | 3 g                  | 3.8 g                | 17.1 g                   |
| Fat                                 | 1 g                  |                      | 10 g                     |
| Carbohydrates                       | 6 g                  |                      | 63.1 g                   |
| Iron                                | 7.5 mg               | 6.0 mg               | 6 mg                     |
| Zinc                                | 5 mg                 | 4.1 mg               |                          |
| Calcium                             | 200 mg               | 385 mg               | 523 mg                   |
| Vitamin A                           | 250 µg               |                      | 333 µg                   |
| Vitamin B1                          | 0.5 mg               |                      | 0.54 mg                  |
| Vitamin B2                          | 0.5 mg               | 0.2 mg               | 0.87 mg                  |
| Vitamin B3                          |                      |                      | 1.72 mg                  |
| Vitamin B12                         | 0.5 µg               |                      |                          |
| Vitamin D                           | 5 µg                 | 7 µg                 | 2 mg                     |
| Folic acid                          | 75 µg                |                      |                          |
| Phosphorus                          |                      |                      | 325 mg                   |
| <b>Number of controlled studies</b> | <b>11</b>            | <b>6</b>             | <b>1</b>                 |
| <b>Number of pre-post studies</b>   | <b>14</b>            | <b>0</b>             | <b>0</b>                 |

**Table S4:** Effects of YYB by intervention duration on hemoglobin concentration (g/L), height (cm), weight (kg) and Z-scores.

| <b>Post-only with concurrent control studies</b> | Number of studies | Mean difference (95%CI) | P-value for summary effects | I <sup>2</sup> for heterogeneity (%) |
|--------------------------------------------------|-------------------|-------------------------|-----------------------------|--------------------------------------|
| Hemoglobin concentration (g/L)                   |                   |                         |                             |                                      |
| >12 months                                       | 2                 | 6.17 (-0.09, 12.42)     | 0.053                       | 92                                   |
| ≤12 months                                       | 5                 | 3.78 (-0.57, 8.12)      | 0.088                       | 97                                   |
| Height (cm)                                      |                   |                         |                             |                                      |
| >12 months                                       | 2                 | 1.10 (-0.77, 2.96)      | 0.249                       | 77                                   |
| ≤12 months                                       | 4                 | 3.16 (1.41, 4.90)       | <0.001                      | 93                                   |
| Weight (kg)                                      |                   |                         |                             |                                      |
| >12 months                                       | 2                 | 0.64 (-0.09, 1.38)      | 0.085                       | 88                                   |
| ≤12 months                                       | 4                 | 0.85 (0.12, 1.59)       | 0.023                       | 98                                   |
| Height-for-age Z score (SD)                      |                   |                         |                             |                                      |
| >12 months                                       | 1                 | -0.57 (-0.97, -0.17)    | 0.006                       | \                                    |
| ≤12 months                                       | 2                 | 0.22 (-0.50, 0.95)      | 0.548                       | 96                                   |
| Weight-for-height Z score (SD)                   |                   |                         |                             |                                      |
| >12 months                                       | 1                 | 0.58 (0.24, 0.92)       | 0.001                       | \                                    |
| ≤12 months                                       | 2                 | 0.19 (0.09, 0.30)       | <0.001                      | 22                                   |
| Weight-for-age Z score (SD)                      |                   |                         |                             |                                      |
| >12 months                                       | 1                 | 0.54 (0.20, 0.88)       | 0.002                       | \                                    |
| ≤12 months                                       | 2                 | 0.07 (-0.26, 0.41)      | 0.669                       | 91                                   |
| <b>Pre-post studies</b>                          | Number of studies | Mean difference (95%CI) | P-value for summary effects | I <sup>2</sup> for heterogeneity (%) |
| Hemoglobin concentration (g/L)                   |                   |                         |                             |                                      |

|                                |   |                    |        |    |
|--------------------------------|---|--------------------|--------|----|
| >12 months                     | 4 | 8.82 (2.02, 15.62) | 0.011  | 99 |
| ≤12 months                     | 3 | 3.59 (0.32, 6.86)  | 0.031  | 93 |
| Height (cm)                    |   |                    |        |    |
| >12 months                     | 2 | 3.27 (2.57, 3.97)  | <0.001 | 0  |
| ≤12 months                     | 3 | 2.01 (0.54, 3.49)  | 0.007  | 92 |
| Weight (kg)                    |   |                    |        |    |
| >12 months                     | 2 | 0.85 (0.35, 1.35)  | 0.001  | 87 |
| ≤12 months                     | 3 | 0.63 (0.09, 1.17)  | 0.023  | 96 |
| Height-for-age Z score (SD)    |   |                    |        |    |
| >12 months                     | 3 | 0.35 (0.24, 0.46)  | <0.001 | 9  |
| ≤12 months                     | 2 | 0.09 (-0.02, 0.20) | 0.115  | 0  |
| Weight-for-height Z score (SD) |   |                    |        |    |
| >12 months                     | 2 | 0.31 (0.03, 0.58)  | 0.028  | 80 |
| ≤12 months                     | 2 | 0.25 (-0.44, 0.93) | 0.478  | 98 |
| Weight-for-age Z score (SD)    |   |                    |        |    |
| >12 months                     | 3 | 0.23 (-0.21, 0.67) | 0.304  | 95 |
| ≤12 months                     | 2 | 0.29 (-0.32, 0.90) | 0.352  | 98 |

---

**Table S5:** Effects of YYB by intervention duration on prevalence of anemia, stunting, underweight and wasting.

| <b>Post-only with<br/>concurrent<br/>control studies</b> | Number<br>of<br>studies | Risk ratio<br>(95%CI) | P-value for<br>summary<br>effects | I <sup>2</sup> for<br>heterogeneity<br>(%) | Risk difference<br>(95%CI) | P-value<br>for<br>summary<br>effects | I <sup>2</sup> for<br>heterogeneity<br>(%) |
|----------------------------------------------------------|-------------------------|-----------------------|-----------------------------------|--------------------------------------------|----------------------------|--------------------------------------|--------------------------------------------|
| Anemia                                                   |                         |                       |                                   |                                            |                            |                                      |                                            |
| >12 months                                               | 3                       | 0.45 (0.27, 0.75)     | 0.002                             | 87                                         | -0.22 (-0.35, -0.10)       | <0.001                               | 93                                         |
| ≤12 months                                               | 8                       | 0.55 (0.41, 0.74)     | <0.001                            | 85                                         | -0.10 (-0.16, -0.05)       | <0.001                               | 89                                         |
| Underweight                                              |                         |                       |                                   |                                            |                            |                                      |                                            |
| >12 months                                               | 1                       | 0.68 (0.26, 1.83)     | 0.449                             | \                                          | -0.04 (-0.13, 0.06)        | 0.444                                | \                                          |
| ≤12 months                                               | 5                       | 0.50 (0.38, 0.65)     | <0.001                            | 34                                         | -0.04 (-0.06, -0.03)       | <0.001                               | 0                                          |
| Stunting                                                 |                         |                       |                                   |                                            |                            |                                      |                                            |
| >12 months                                               | 2                       | 0.48 (0.38, 0.60)     | <0.001                            | 0                                          | -0.08 (-0.10, -0.05)       | <0.001                               | 0                                          |
| ≤12 months                                               | 5                       | 0.63 (0.44, 0.92)     | 0.016                             | 70                                         | -0.05 (-0.08, -0.02)       | 0.002                                | 52                                         |
| Wasting                                                  |                         |                       |                                   |                                            |                            |                                      |                                            |
| >12 months                                               | 1                       | 0.77 (0.28, 2.11)     | 0.612                             | \                                          | -0.02 (-0.11, 0.07)        | 0.609                                | \                                          |
| ≤12 months                                               | 4                       | 0.44 (0.29, 0.67)     | <0.001                            | 29                                         | -0.03 (-0.04, -0.01)       | <0.001                               | 63                                         |
| <b>Pre-post<br/>studies</b>                              | Number<br>of<br>studies | Risk ratio<br>(95%CI) | P-value for<br>summary<br>effects | I <sup>2</sup> for<br>heterogeneity<br>(%) | Risk difference<br>(95%CI) | P-value<br>for<br>summary<br>effects | I <sup>2</sup> for<br>heterogeneity<br>(%) |
| Anemia                                                   |                         |                       |                                   |                                            |                            |                                      |                                            |
| >12 months                                               | 8                       | 0.53 (0.45, 0.64)     | <0.001                            | 84                                         | -0.24 (-0.32, -0.15)       | <0.001                               | 94                                         |
| ≤12 months                                               | 5                       | 0.70 (0.58, 0.85)     | <0.001                            | 81                                         | -0.14 (-0.21, -0.06)       | <0.001                               | 82                                         |
| Underweight                                              |                         |                       |                                   |                                            |                            |                                      |                                            |
| >12 months                                               | 6                       | 0.64 (0.39, 1.04)     | 0.071                             | 70                                         | -0.03 (-0.06, 0.00)        | 0.083                                | 81                                         |

|            |   |                   |       |    |                      |       |    |
|------------|---|-------------------|-------|----|----------------------|-------|----|
| ≤12 months | 4 | 0.52 (0.30, 0.90) | 0.019 | 61 | -0.03 (-0.05, -0.01) | 0.004 | 51 |
| Stunting   |   |                   |       |    |                      |       |    |
| >12 months | 6 | 0.72 (0.51, 1.03) | 0.073 | 77 | -0.04 (-0.08, 0.00)  | 0.069 | 78 |
| ≤12 months | 4 | 0.81 (0.61, 1.07) | 0.131 | 37 | -0.02 (-0.05, 0.00)  | 0.088 | 38 |
| Wasting    |   |                   |       |    |                      |       |    |
| >12 months | 5 | 0.71 (0.51, 0.98) | 0.035 | 0  | -0.01 (-0.03, 0.00)  | 0.126 | 38 |
| ≤12 months | 2 | 0.51 (0.05, 5.29) | 0.569 | 89 | -0.01 (-0.07, 0.05)  | 0.741 | 92 |

---

**Table S6:** Effects of YYB on hemoglobin concentration (g/L), height (cm), weight (kg) and Z-scores among studies of high and medium quality<sup>1</sup>.

| <b>Post-only with concurrent control studies</b> | Number of studies | Mean difference (95%CI) | P-value for summary effects | I <sup>2</sup> for heterogeneity (%) |
|--------------------------------------------------|-------------------|-------------------------|-----------------------------|--------------------------------------|
| Hemoglobin concentration (g/L)                   | 6                 | 5.23 (2.14, 8.31)       | 0.001                       | 97                                   |
| Height (cm)                                      | 5                 | 2.82 (0.89, 4.75)       | 0.004                       | 95                                   |
| Weight (kg)                                      | 5                 | 0.85 (0.19, 1.51)       | 0.011                       | 97                                   |
| Height-for-age Z score (SD)                      | 3                 | -0.03 (-0.68, 0.62)     | 0.938                       | 95                                   |
| Weight-for-height Z score (SD)                   | 3                 | 0.27 (0.09, 0.45)       | 0.003                       | 66                                   |
| Weight-for-age Z score (SD)                      | 3                 | 0.20 (-0.11, 0.51)      | 0.213                       | 89                                   |
| <b>Pre-post studies</b>                          | Number of studies | Mean difference (95%CI) | P-value for summary effects | I <sup>2</sup> for heterogeneity (%) |
| Hemoglobin concentration (g/L)                   | 6                 | 6.44 (2.21, 10.67)      | 0.003                       | 99                                   |
| Height (cm)                                      | 4                 | 2.26 (0.99, 3.52)       | <0.001                      | 90                                   |
| Weight (kg)                                      | 4                 | 0.59 (0.23, 0.96)       | 0.001                       | 92                                   |
| Height-for-age Z score (SD)                      | 4                 | 0.28 (0.11, 0.45)       | 0.001                       | 73                                   |
| Weight-for-height Z score (SD)                   | 3                 | 0.17 (-0.15, 0.49)      | 0.304                       | 92                                   |
| Weight-for-age Z score (SD)                      | 4                 | 0.17 (-0.15, 0.48)      | 0.301                       | 94                                   |

<sup>1</sup> High and medium quality studies refers to post-only with concurrent control studies with total quality scores  $\geq 50$ , and pre-post studies with total quality scores  $\geq 31$ .

**Table S7:** Effects of YYB on prevalence of anemia, stunting, underweight and wasting among studies of high and medium quality<sup>1</sup>.

| <b>Post-only with<br/>concurrent<br/>control studies</b> | Number<br>of<br>studies | Risk ratio<br>(95%CI) | P-value for<br>summary<br>effects | I <sup>2</sup> for<br>heterogeneity<br>(%) | Risk difference<br>(95%CI) | P-value<br>for<br>summary<br>effects | I <sup>2</sup> for<br>heterogeneity<br>(%) |
|----------------------------------------------------------|-------------------------|-----------------------|-----------------------------------|--------------------------------------------|----------------------------|--------------------------------------|--------------------------------------------|
| Anemia                                                   | 9                       | 0.53 (0.44, 0.64)     | <0.001                            | 75                                         | -0.15 (-0.23, -0.07)       | <0.001                               | 96                                         |
| Underweight                                              | 4                       | 0.42 (0.29, 0.59)     | <0.001                            | 0                                          | -0.04 (-0.05, -0.02)       | <0.001                               | 0                                          |
| Stunting                                                 | 5                       | 0.54 (0.38, 0.78)     | 0.001                             | 76                                         | -0.06 (-0.09, -0.03)       | <0.001                               | 62                                         |
| Wasting                                                  | 4                       | 0.45 (0.30, 0.68)     | <0.001                            | 29                                         | -0.03 (-0.05, -0.00)       | 0.026                                | 57                                         |
| <b>Pre-post<br/>studies</b>                              | Number<br>of<br>studies | Risk ratio<br>(95%CI) | P-value for<br>summary<br>effects | I <sup>2</sup> for<br>heterogeneity<br>(%) | Risk difference<br>(95%CI) | P-value<br>for<br>summary<br>effects | I <sup>2</sup> for<br>heterogeneity<br>(%) |
| Anemia                                                   | 9                       | 0.61 (0.51, 0.73)     | <0.001                            | 91                                         | -0.21 (-0.29, -0.13)       | <0.001                               | 95                                         |
| Underweight                                              | 8                       | 0.69 (0.51, 0.93)     | 0.017                             | 50                                         | -0.02 (-0.04, -0.00)       | 0.026                                | 60                                         |
| Stunting                                                 | 8                       | 0.79 (0.62, 1.01)     | 0.057                             | 65                                         | -0.03 (-0.05, -0.00)       | 0.041                                | 64                                         |
| Wasting                                                  | 5                       | 0.93 (0.70, 1.23)     | 0.599                             | 40                                         | -0.00 (-0.01, 0.01)        | 0.595                                | 42                                         |

<sup>1</sup> High and medium quality studies refer to post-only with concurrent control studies with total quality scores  $\geq 50$ , and pre-post studies with total quality scores  $\geq 31$ .

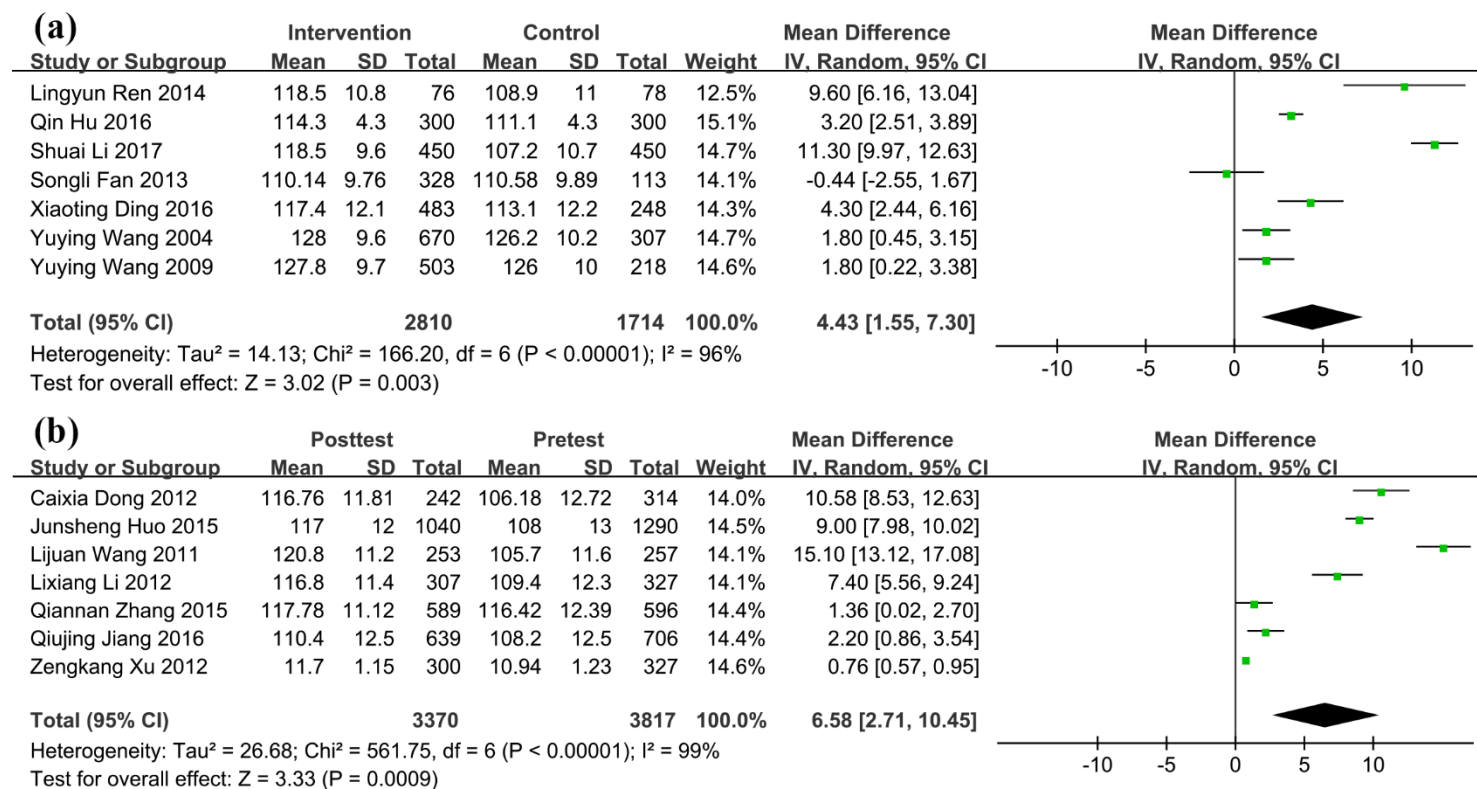

**Figure S1:** Effects of YYB on hemoglobin level (g/L) among post-only with concurrent control studies (a) and pre-post studies (b) using mean difference as the effect measure.

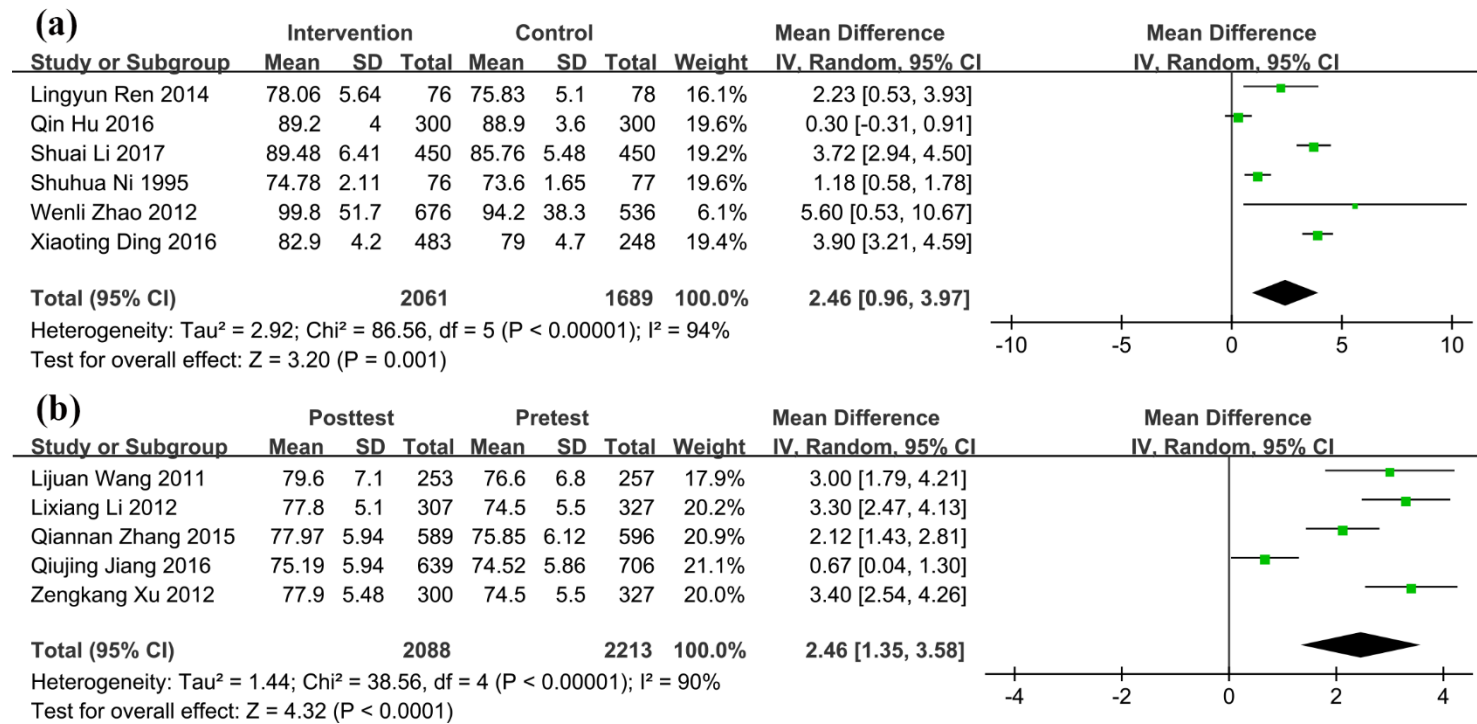

**Figure S2:** Effects of YYB on height (cm) among post-only with concurrent control studies (a) and pre-post studies (b) using mean difference as the effect measure.

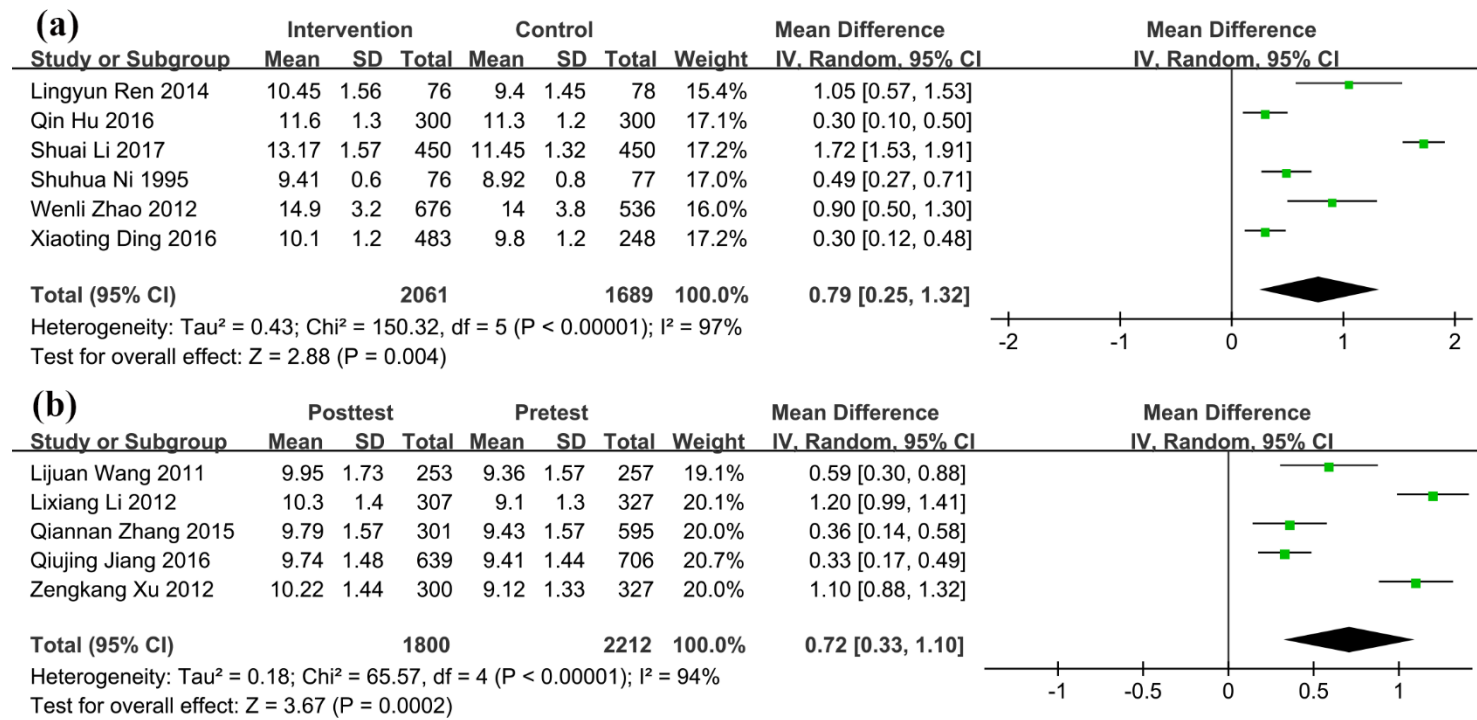

**Figure S3:** Effects of YYB on weight (kg) among post-only with concurrent control studies (a) and pre-post studies (b) using mean difference as the effect measure.

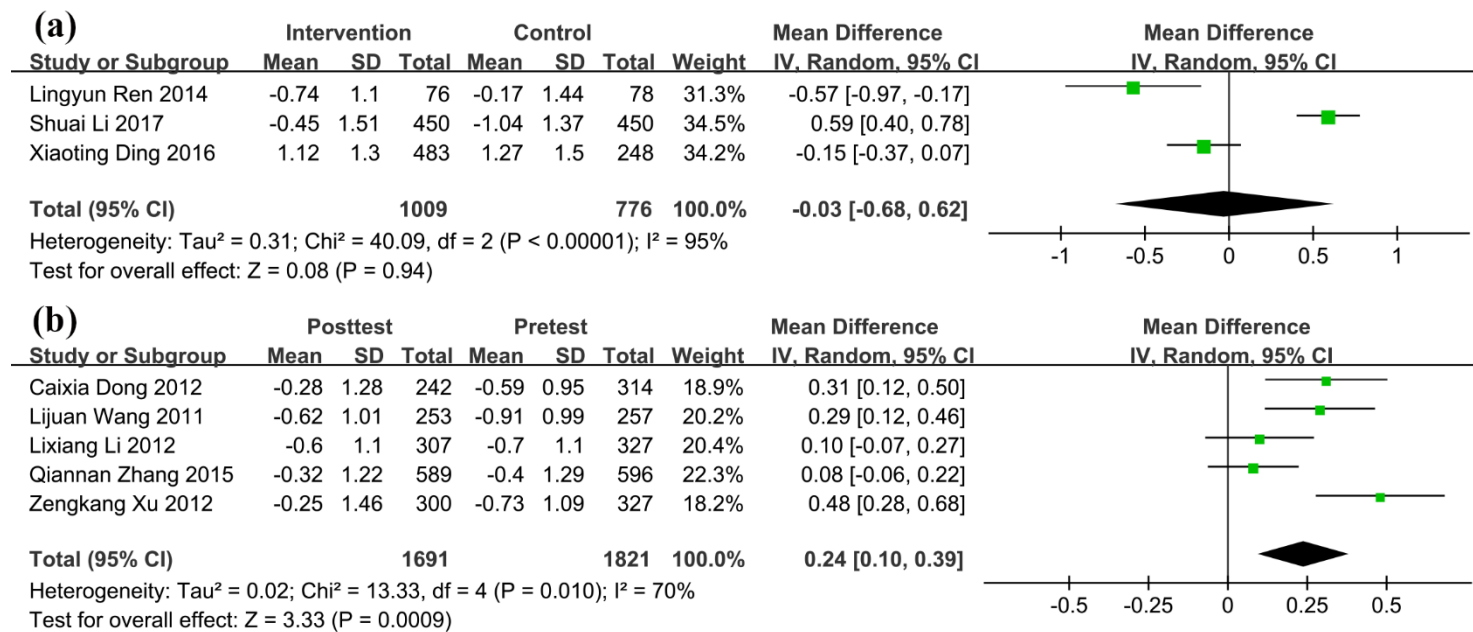

**Figure S4:** Effects of YYB on height-for-age z score (HAZ) among post-only with concurrent control studies (a) and pre-post studies (b) using mean difference as the effect measure.

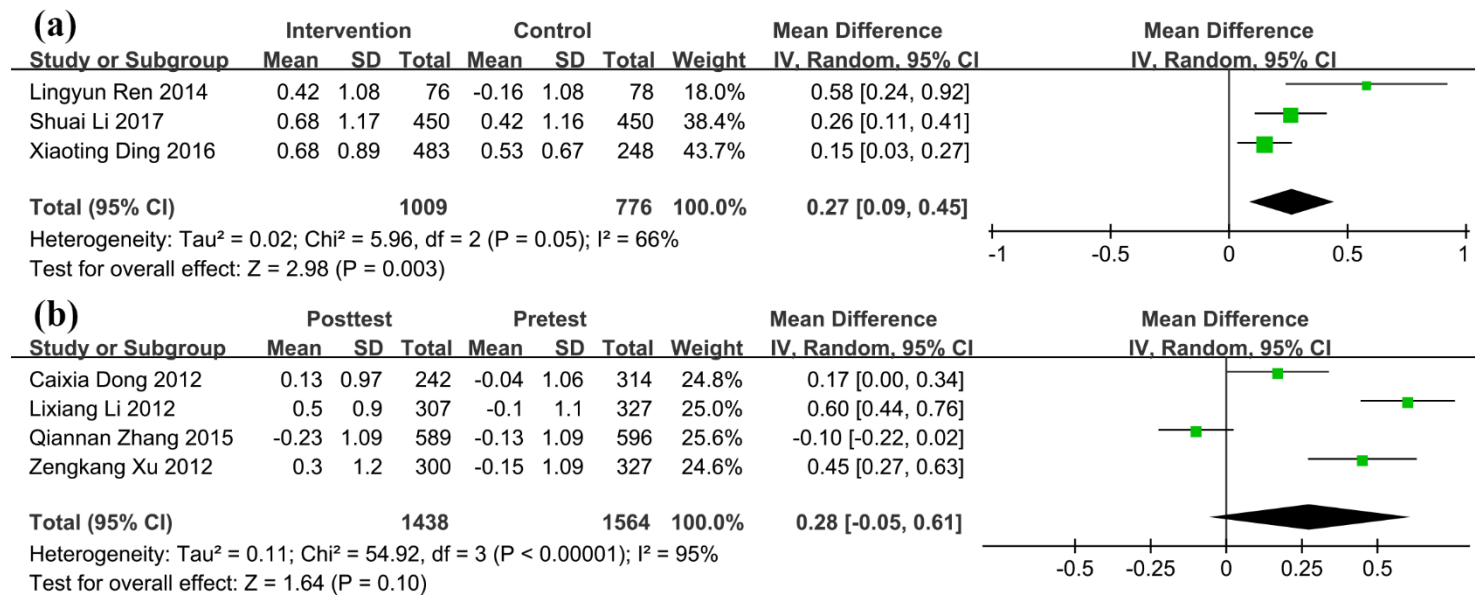

**Figure S5:** Effects of YYB on weight-for-height z score (WHZ) among post-only with concurrent control studies (a) and pre-post studies (b) using mean difference as the effect measure.

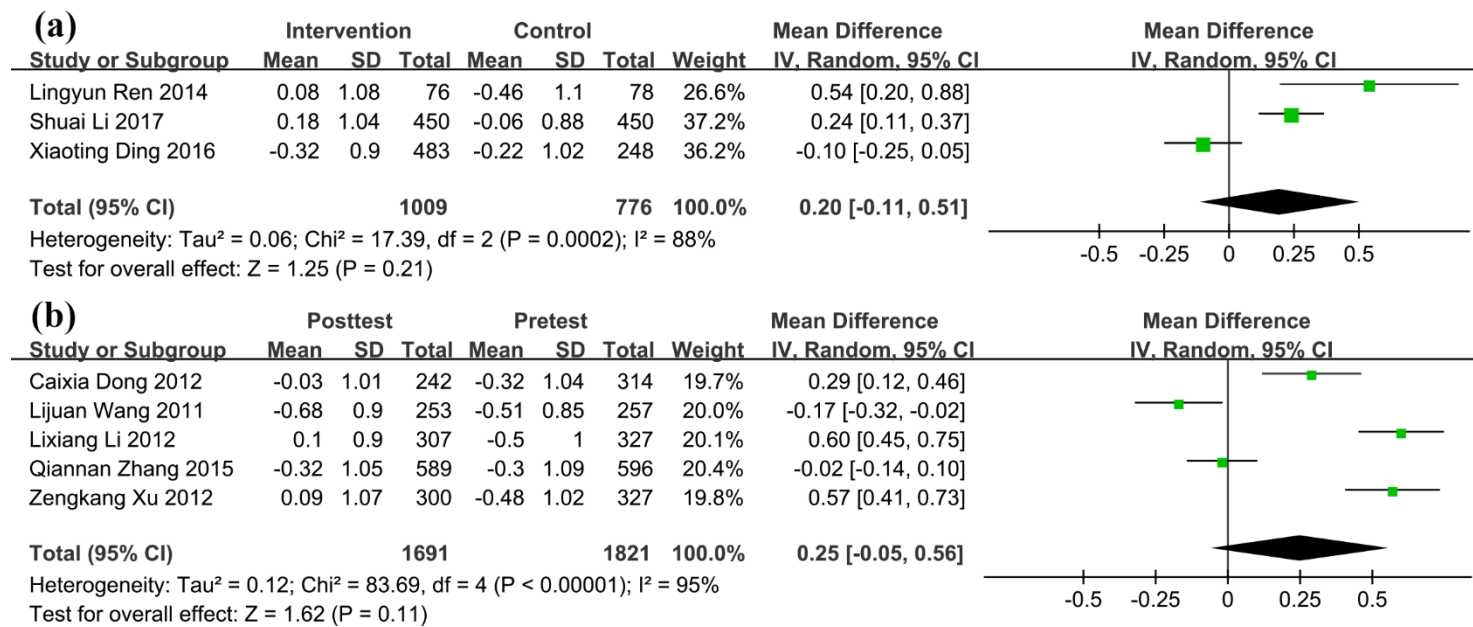

**Figure S6:** Effects of YYB on weight-for-age z score (WAZ) among post-only with concurrent control studies (a) and pre-post studies (b) using mean difference as the effect measure.

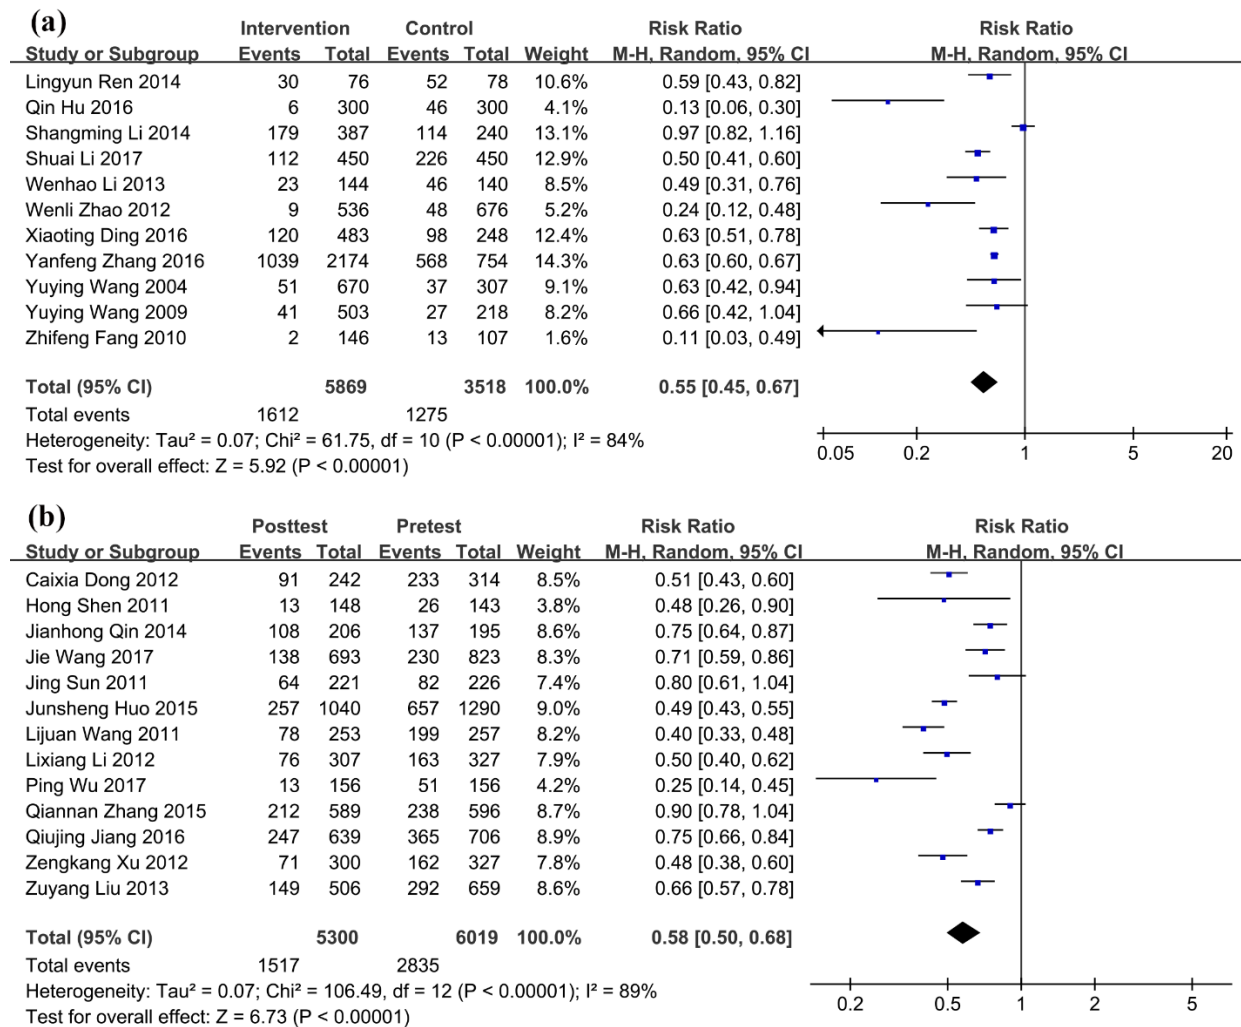

**Figure S7:** Effects of YYB on anemia prevalence among post-only with concurrent control studies (a) and pre-post studies (b) using risk ratio as the effect measure.

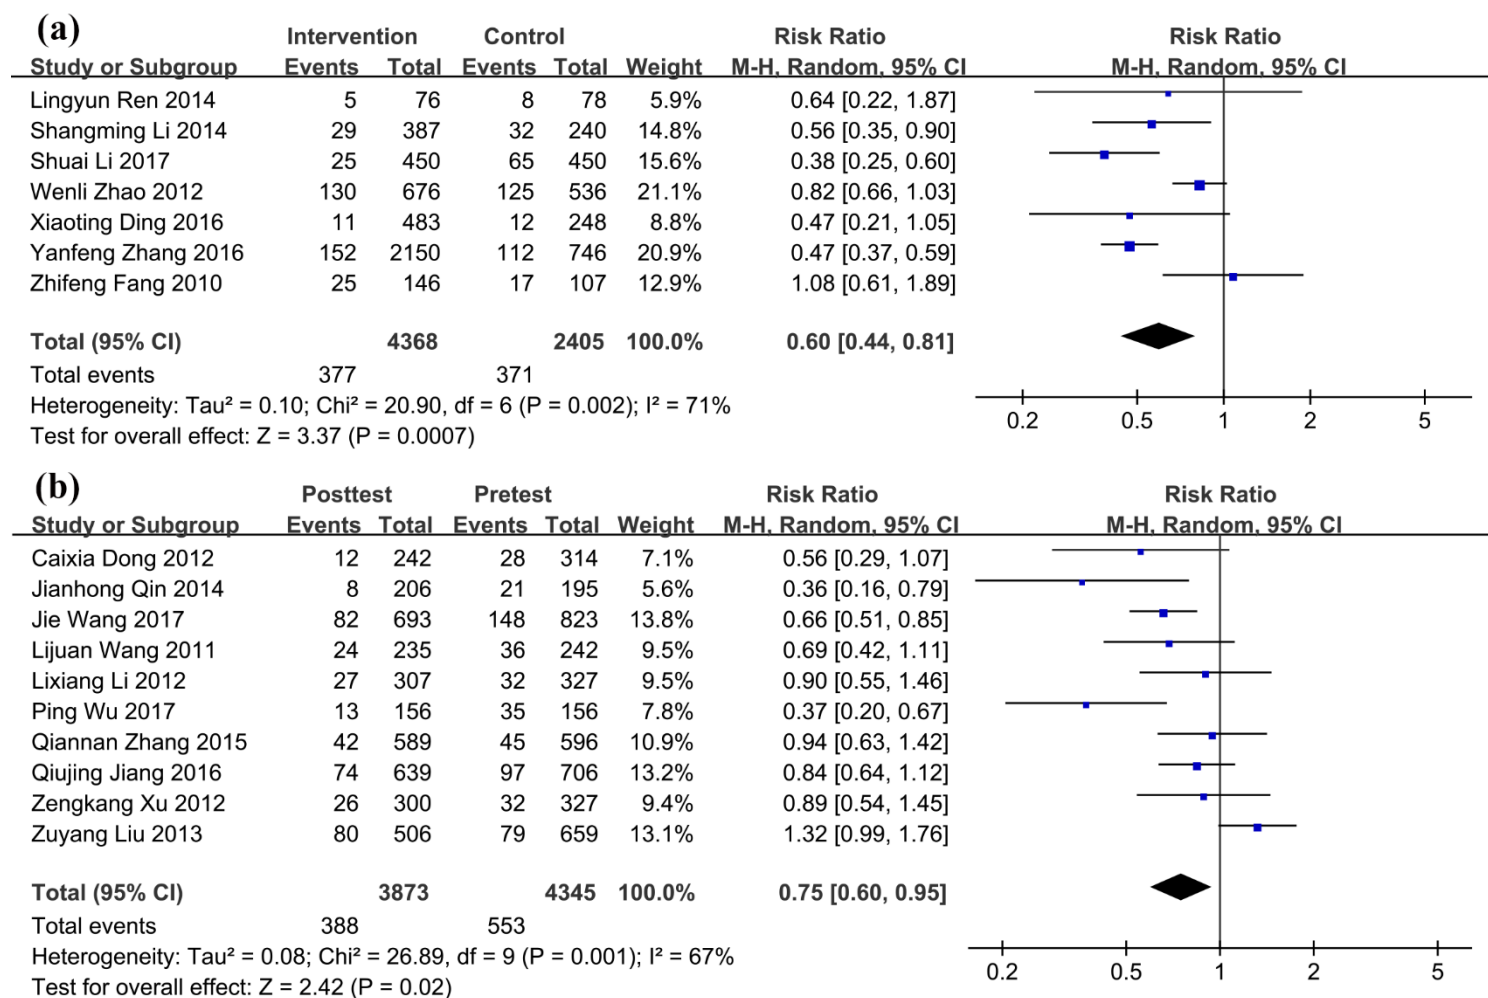

**Figure S8:** Effects of YYB on stunting prevalence among post-only with concurrent control studies (a) and pre-post studies (b) using risk ratio as the effect measure.

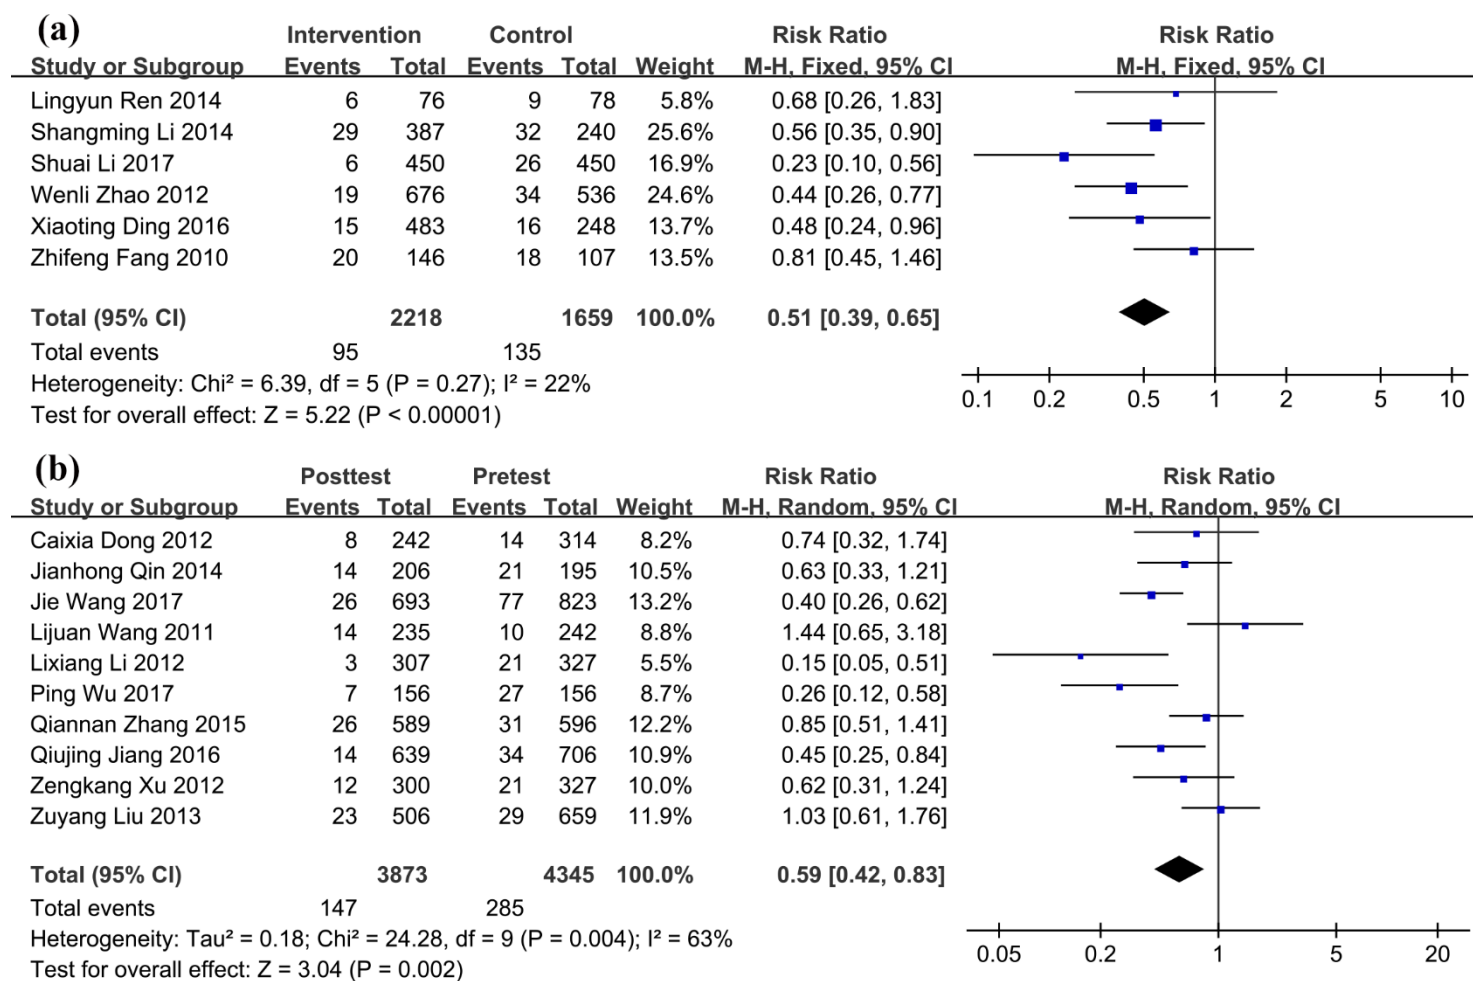

**Figure S9:** Effects of YYB on underweight prevalence among post-only with concurrent control studies (a) and pre-post studies (b) using risk ratio as the effect measure.

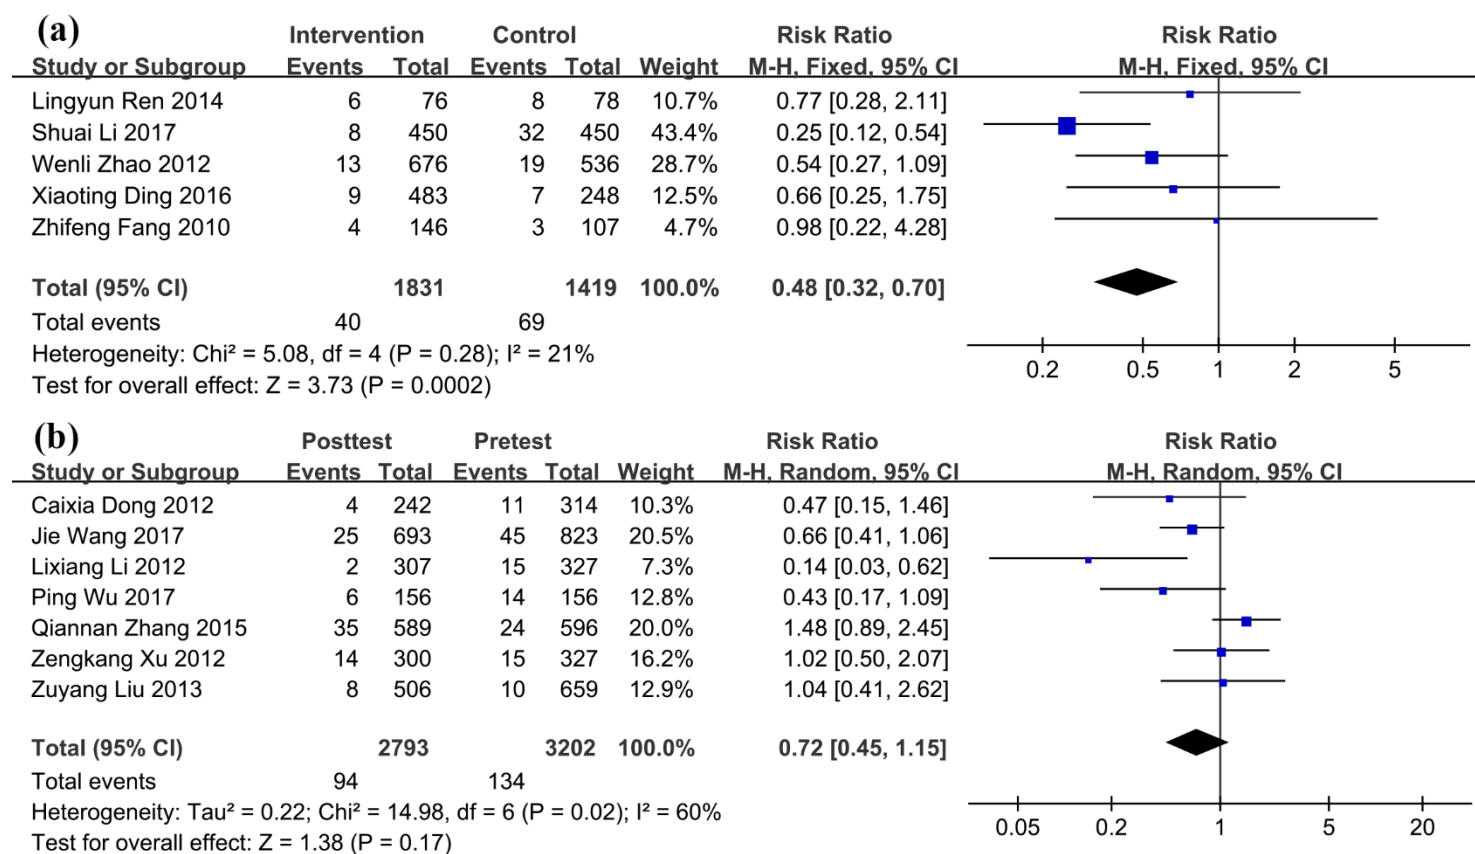

**Figure S10:** Effects of YYB on wasting prevalence among post-only with concurrent control studies (a) and pre-post studies (b) using risk ratio as the effect measure.

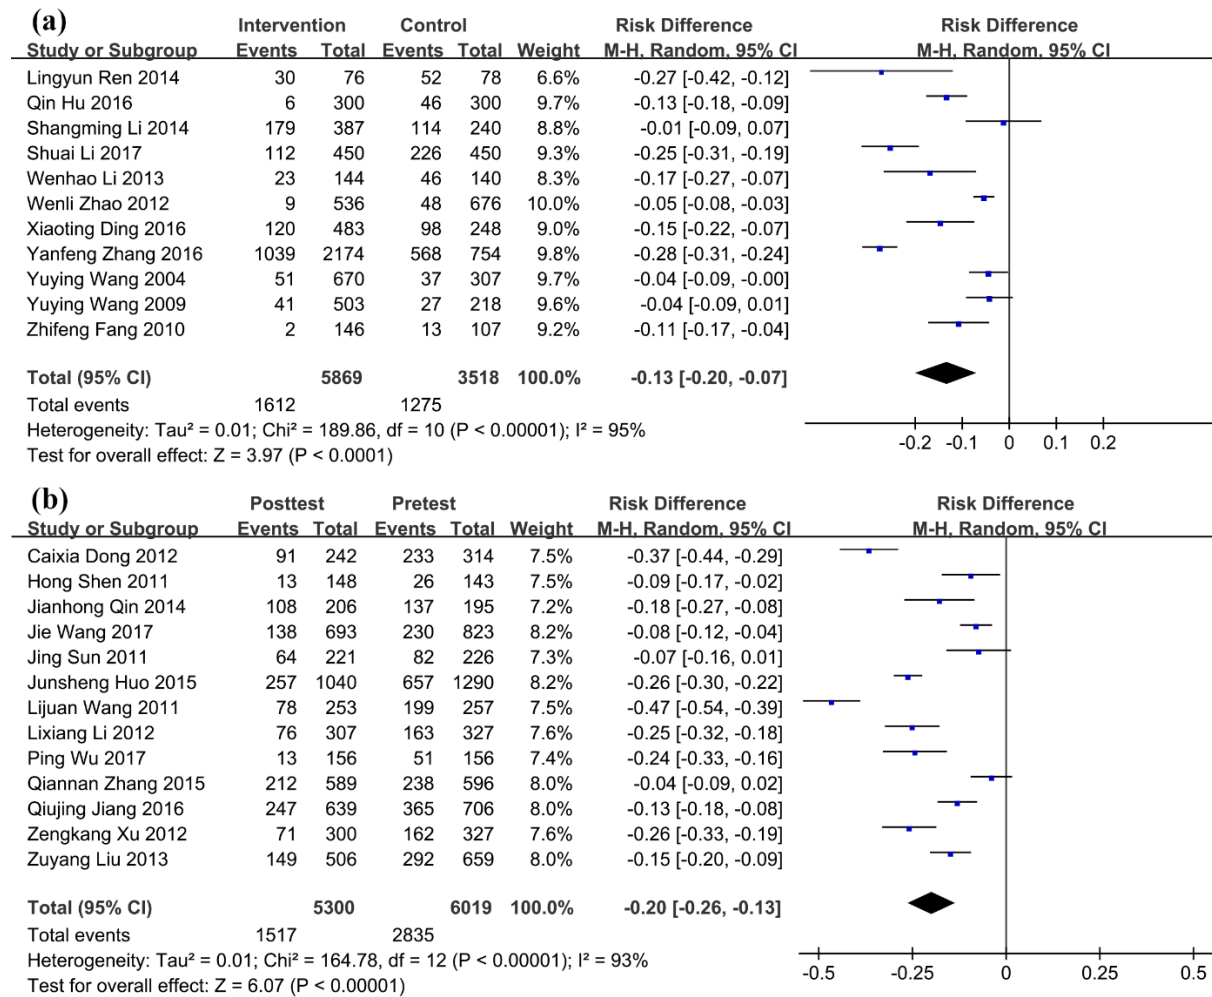

**Figure S11:** Effects of YYB on anemia prevalence among post-only with concurrent control studies (a) and pre-post studies (b) using risk difference as the effect measure.

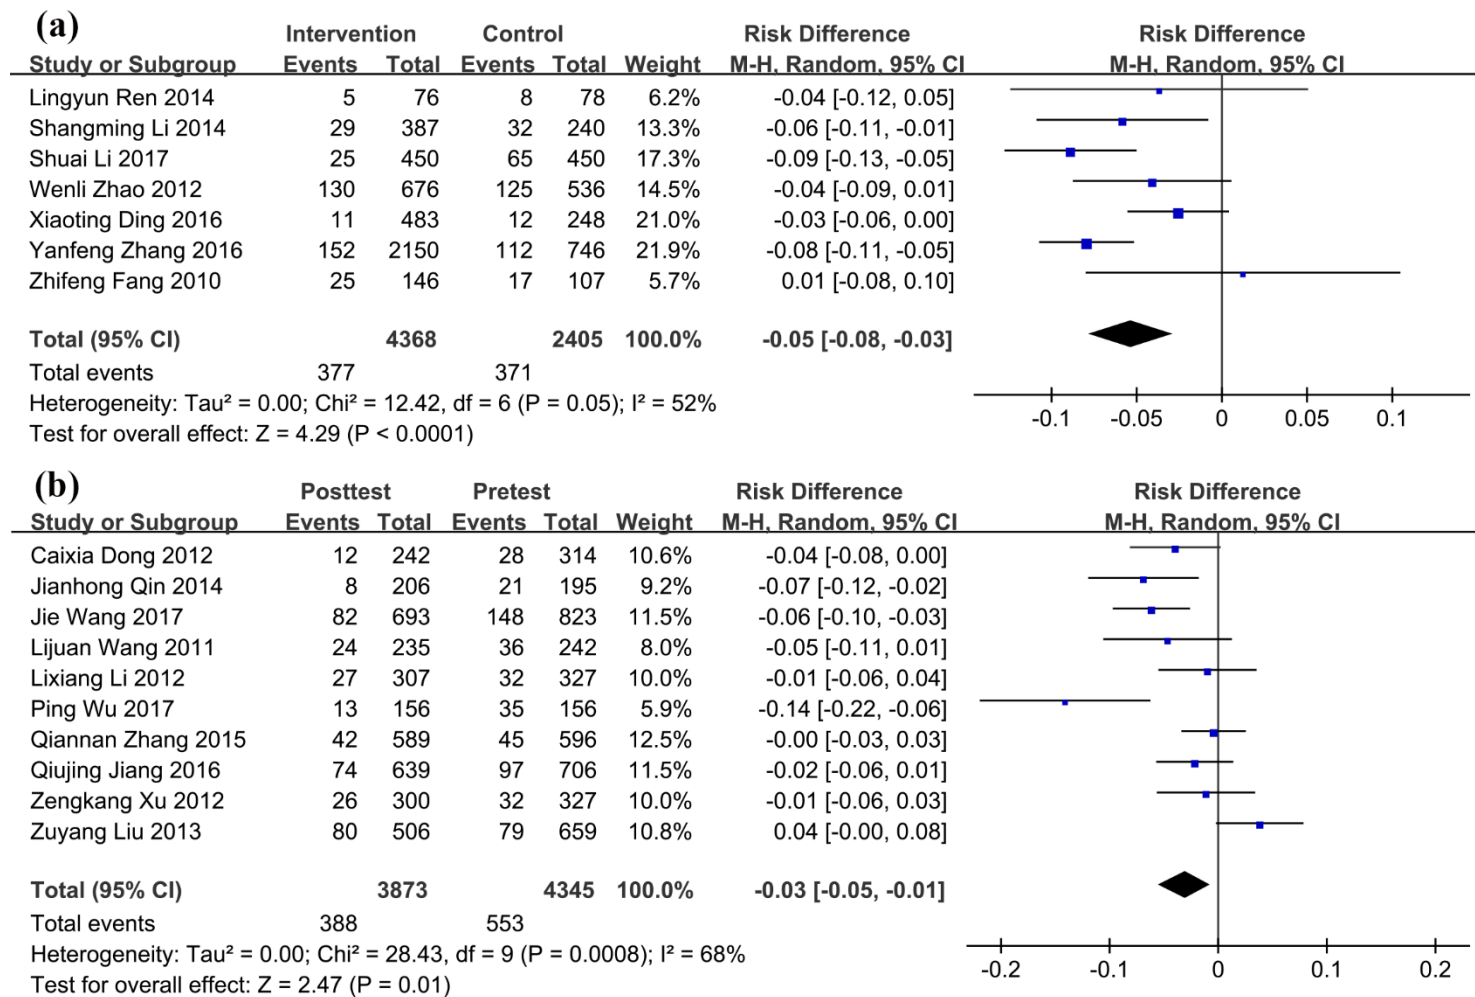

**Figure S12:** Effects of YYB on stunting prevalence among post-only with concurrent control studies (a) and pre-post studies (b) using risk difference as the effect measure.

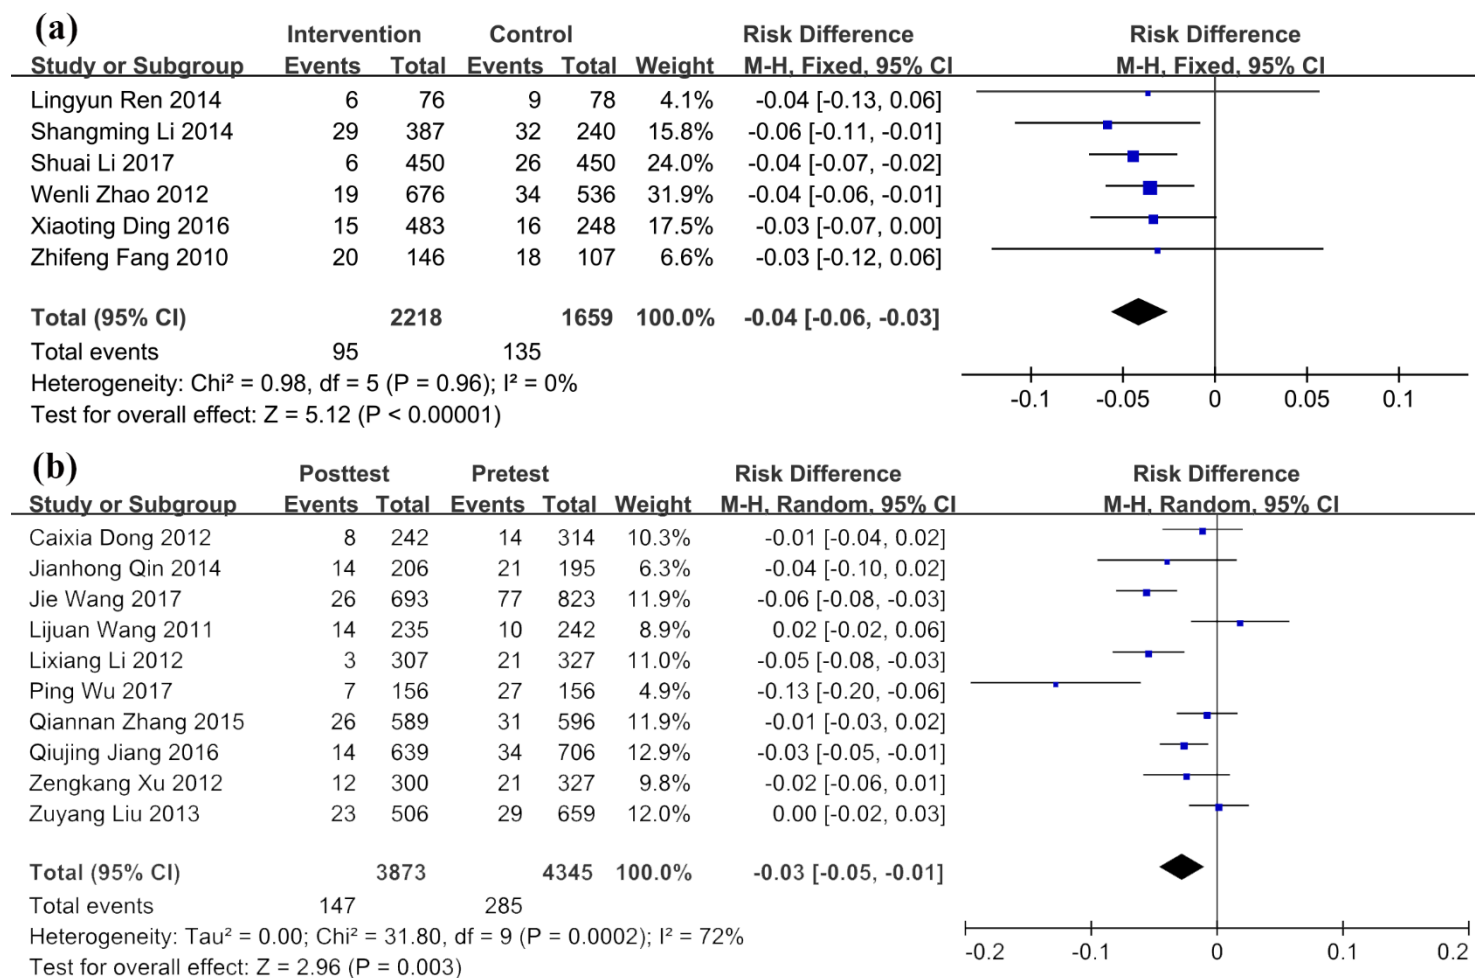

**Figure S13:** Effects of YYB on underweight prevalence among post-only with concurrent control studies (a) and pre-post studies (b) using risk difference as the effect measure.

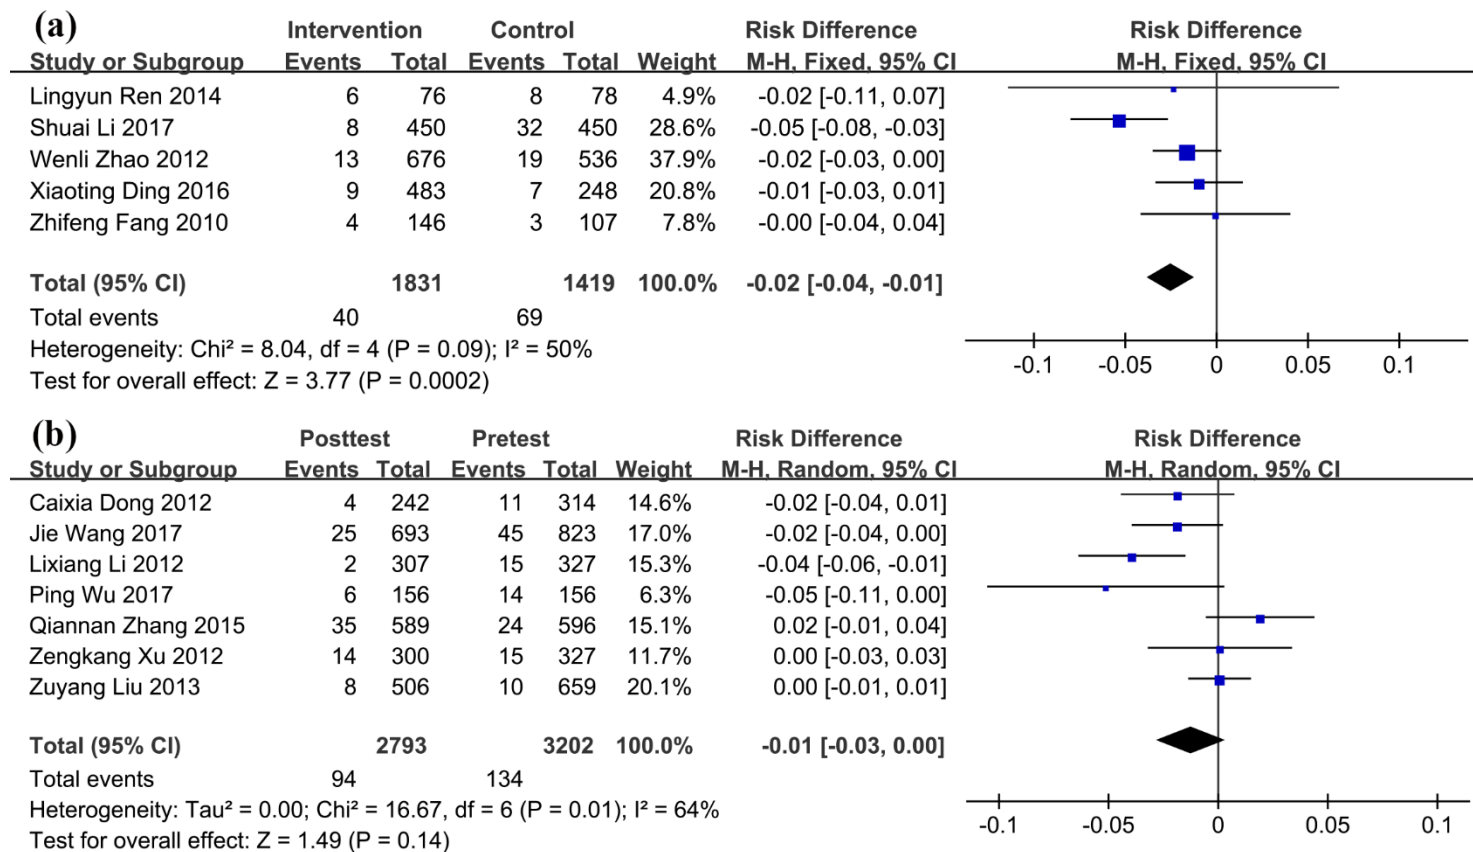

**Figure S14:** Effects of YYB on wasting prevalence among post-only with concurrent control studies (a) and pre-post studies (b) using risk difference as the effect measure.

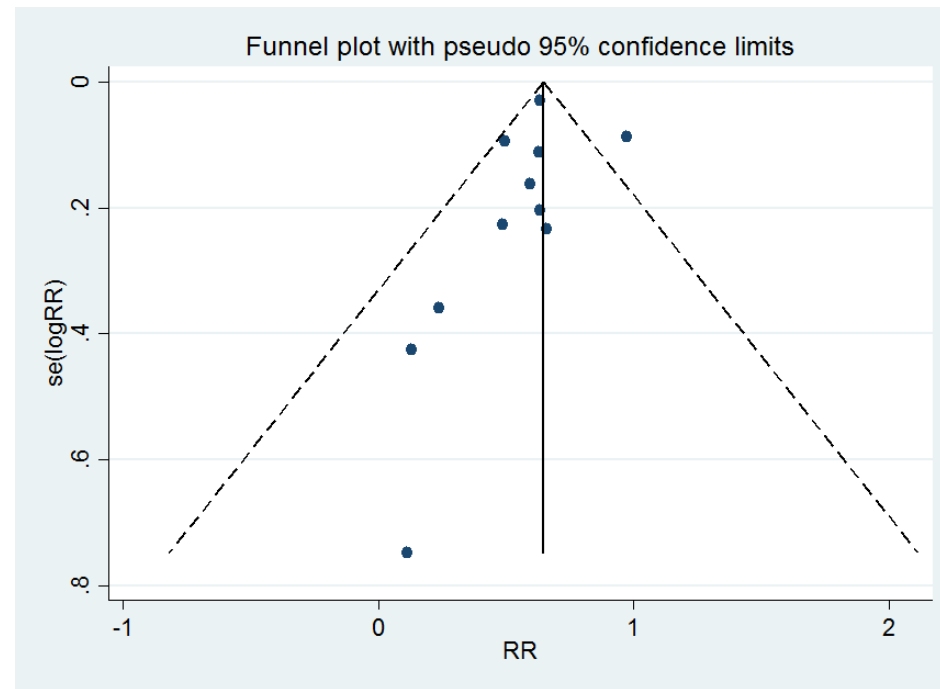

**Figure S15:** Funnel plot of effects of YYB on anemia prevalence among post-only with concurrent control studies.

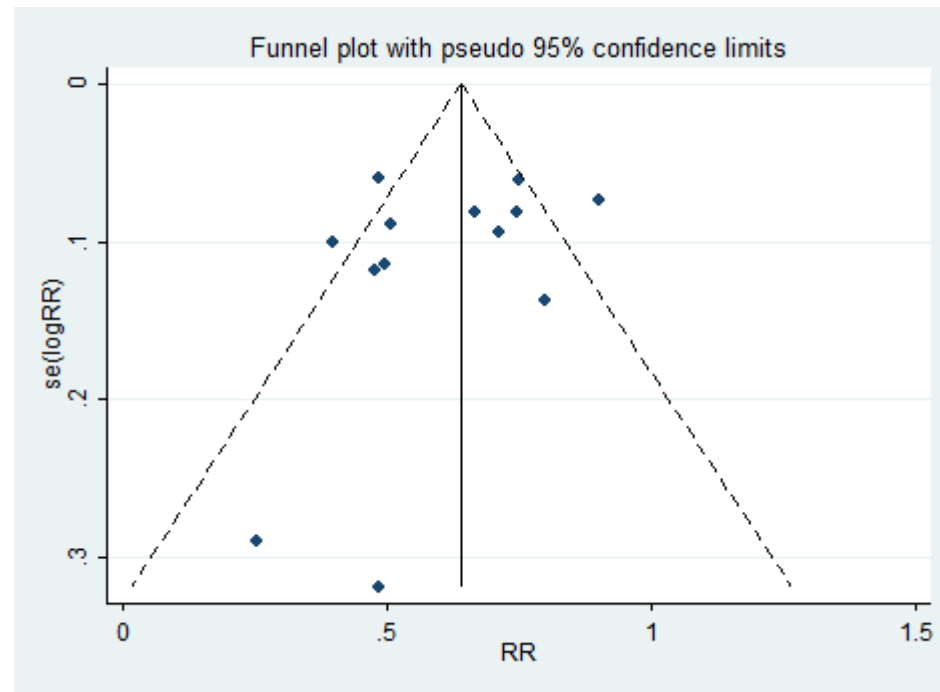

**Figure S16:** Funnel plot of effects of YYB on anemia prevalence among pre-post studies.
